# Supplementary material for: Health Perceptions, Multimorbidity, and New Fractures and Mortality Among Patients With a Fracture
Source: PubMed Central journal article supplement (PMC11043901; doi:10.1001/jamanetworkopen.2024.8491), 2024-04-24
Supplement: jamanetwopen-e248491-s001.pdf [file jamanetwopen-e248491-s001.pdf]

## Data Sharing Statement

Alarkawi. Health Perceptions, Multimorbidity, and New Fractures and Mortality Among Patients With a Fracture. *JAMA Netw Open*. Published April 24, 2024.

doi:10.1001/jamanetworkopen.2024.8491

### Data

**Data available:** No

### Additional Information

**Explanation for why data not available:** The data set could be available to other researchers if they obtain the necessary approvals. Further information on this process can be obtained from the 45 and Up Study (45andUp.research@ saxinstitute.org.au).
